# Supplementary material for: Global Prevalence of Macroprolactinemia among Patients with Hyperprolactinemia: A Systematic Review and Meta-Analysis
Source: PubMed Central journal article supplement (PMC7664288; doi:10.3390/ijerph17218199), 2020-11-06
Supplement: ijerph-17-08199-s001.pdf [file ijerph-17-08199-s001.pdf]

**Table S1.** “Leave-one-out” sensitivity analysis for the meta-analysis on the prevalence of macroprolactinemia among patients with hyperprolactinemia.

| <b>Study Omitted</b>         | <b>Prevalence Estimate (Coefficient) (%)</b> | <b>95% CI</b> |
|------------------------------|----------------------------------------------|---------------|
| Larrea et al. [24]           | 18.7                                         | 17.1, 20.2    |
| Fahie-Wilson et al. [25]     | 18.6                                         | 17.1, 20.1    |
| Vieira et al. [26]           | 16.8                                         | 15.3, 18.4    |
| Olukoga et al. [27]          | 18.7                                         | 17.2, 20.2    |
| Blanco-Favela et al. [28]    | 18.7                                         | 17.1, 20.2    |
| Leaños-Miranda et al. [29]   | 18.6                                         | 17.1, 20.1    |
| Sánchez-Eixerés et al. [30]  | 18.8                                         | 17.3, 20.3    |
| Schiettecatte et al. [19]    | 18.6                                         | 17.1, 20.1    |
| Leslie et al. [31]           | 18.1                                         | 16.5, 19.6    |
| Smith et al. [32]            | 18.6                                         | 17.1, 20.1    |
| Hauache et al. [33]          | 18.5                                         | 17.0, 20.0    |
| Sapin et al. [34]            | 18.6                                         | 17.1, 20.1    |
| Vallette-Kasic et al. [35]   | 19.3                                         | 17.7, 20.8    |
| Toldy et al. [36]            | 18.6                                         | 17.1, 20.1    |
| Strachan et al. [37]         | 18.6                                         | 17.1, 20.1    |
| García Menéndez et al. [38]  | 18.6                                         | 17.1, 20.2    |
| García et al. [39]           | 18.7                                         | 17.1, 20.2    |
| Escobar-Morreale et al. [40] | 18.6                                         | 17.1, 20.1    |
| Rivero et al. [41]           | 18.7                                         | 17.2, 20.2    |
| Galoiu et al. [42]           | 18.7                                         | 17.1, 20.2    |
| Germano et al. [43]          | 18.6                                         | 17.1, 20.1    |
| Gibney et al. [18]           | 18.2                                         | 16.6, 19.8    |
| Theunissen et al. [44]       | 18.7                                         | 17.2, 20.2    |
| Hattori et al. [45]          | 18.7                                         | 17.2, 20.2    |
| Alfonso et al. [46]          | 18.5                                         | 17.0, 20.0    |
| Álvarez-Vázquez et al. [47]  | 18.8                                         | 17.3, 20.3    |
| Rivas-Espinosa et al. [48]   | 18.7                                         | 17.1, 20.2    |
| Donadio et al. [49]          | 18.5                                         | 17.0, 20.0    |
| Jokar et al. [50]            | 18.6                                         | 17.1, 20.1    |
| Bağdatoğlu et al. [51]       | 18.7                                         | 17.2, 20.2    |
| Vilar et al. [52]            | 19.4                                         | 17.8, 21.0    |
| Alfadda et al. [53]          | 18.8                                         | 17.3, 20.3    |
| Jassam et al. [54]           | 19.0                                         | 17.5, 20.5    |
| Don-Wauchope et al. [55]     | 18.6                                         | 17.1, 20.1    |
| Hattori et al. [9]           | 18.7                                         | 17.2, 20.2    |
| Anaforoglu et al. [56]       | 18.6                                         | 17.1, 20.1    |
| McCudden et al. [11]         | 18.7                                         | 17.2, 20.2    |
| Gulcelik et al. [57]         | 18.4                                         | 16.9, 19.9    |
| Taghipour et al. [58]        | 18.7                                         | 17.2, 20.2    |
| Can et al. [10]              | 18.6                                         | 17.1, 20.1    |
| Morteza et al. [59]          | 18.7                                         | 17.2, 20.2    |
| Thirunavakkarasu et al. [60] | 18.7                                         | 17.2, 20.2    |
| Sari et al. [61]             | 18.6                                         | 17.1, 20.1    |
| Isik et al. [62]             | 18.5                                         | 17.0, 20.0    |
| Tamer et al. [63]            | 18.5                                         | 17.0, 20.0    |
| Chawla et al. [64]           | 18.6                                         | 17.1, 20.1    |
| Lu et al. [65]               | 18.6                                         | 17.1, 20.2    |
| Kim et al. [66]              | 18.7                                         | 17.2, 20.2    |

---

|                                |      |            |
|--------------------------------|------|------------|
| Leaños-Miranda et al. [67]     | 18.7 | 17.2, 20.2 |
| Alpañés et al. [68]            | 18.7 | 17.2, 20.2 |
| Radavelli-Bagatini et al. [69] | 18.6 | 17.1, 20.1 |
| Jamaluddin et al. [70]         | 18.8 | 17.3, 20.3 |
| Elenkova et al. [71]           | 18.7 | 17.2, 20.3 |
| Whitehead et al. [72]          | 18.7 | 17.2, 20.2 |
| Hayashida et al. [73]          | 18.6 | 17.1, 20.1 |
| Silva et al. [74]              | 18.8 | 17.2, 20.3 |
| Beda-Maluga et al. [75]        | 18.8 | 17.3, 20.3 |
| Parlant-Pinet et al. [76]      | 18.5 | 17.0, 20.0 |
| Che Soh et al. [77]            | 18.8 | 17.2, 20.3 |
| Chen et al. [78]               | 18.6 | 17.1, 20.1 |
| Hattori et al. [79]            | 18.7 | 17.2, 20.2 |
| Akbulut et al. [80]            | 19.0 | 17.4, 20.5 |
| Soto-Pedre et al. [81]         | 19.6 | 18.0, 21.2 |
| Dogansen et al. [82]           | 18.7 | 17.2, 20.2 |
| Kalsi et al. [83]              | 18.6 | 17.1, 20.1 |
| Barth et al. [84]              | 19.2 | 17.7, 20.7 |
| Ayan et al. [85]               | 18.7 | 17.2, 20.2 |

---
